# Supplementary material
Source: PubMed Central journal article supplement (PMC11028289)
Supplement: 262_2018_2230_MOESM1_ESM.pdf [file 262_2018_2230_MOESM1_ESM.pdf]

## Cancer Immunology, Immunotherapy (submitted in 2018)

Julian Plaumann et al.

### Supplementary Table

Supplementary table 1 - Patient characteristics

Patients were subdivided into early plasma-cell diseases (EPD: monoclonal gammopathy of undetermined significance (MGUS), and MM stage I) and advanced plasma-cell diseases (APD: MM stage II and III) (see also figure 2). Shown are the characteristics from 126 samples of 119 patients with EPD or APD, in which we analyzed T-cell compartment from PB or BM (figure 2). Together with the samples from HD, 181 total samples were analyzed.

|                                     | No. of samples |            |
|-------------------------------------|----------------|------------|
|                                     | EPD            | APD        |
| <b>Total</b>                        | 57             | 69         |
| BM                                  | 19             | 40         |
| PB                                  | 38             | 29         |
| <b>Gender</b>                       |                |            |
| Male                                | 29 (50.9%)     | 44 (63.8%) |
| Female                              | 28 (49.1%)     | 25 (36.2%) |
| <b>Median age (years)</b>           | 56             | 62         |
| <b>Stage<br/>(Salmon and Durie)</b> |                |            |
| MGUS                                | 39 (68.4%)     |            |
| IA                                  | 18 (31.6%)     |            |
| IIA                                 |                | 3 (4.3%)   |
| IIIA                                |                | 58 (84.1%) |
| IIIB                                |                | 8 (11.6%)  |

## Supplementary Figure 1

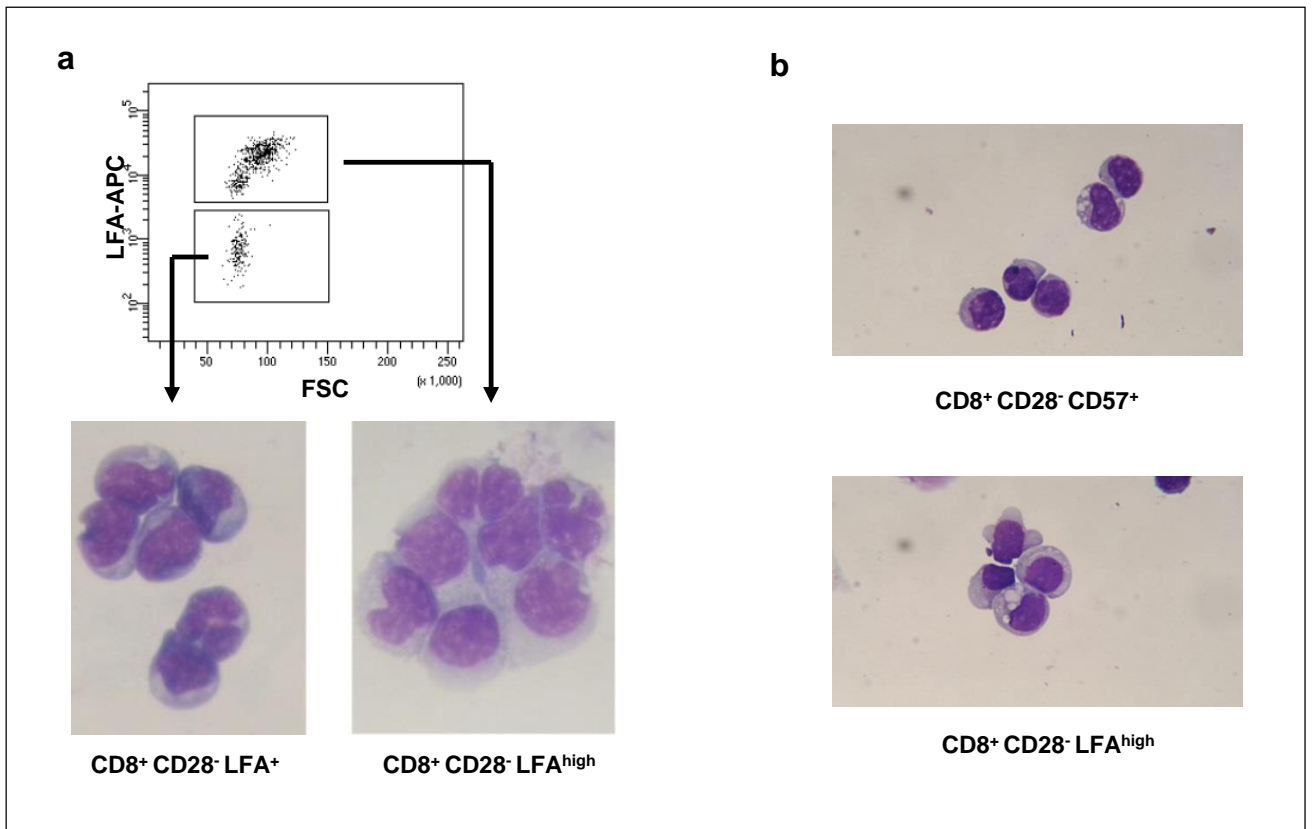

a) Morphology of CD8<sup>+</sup>CD28<sup>-</sup>LFA<sup>+</sup> and CD8<sup>+</sup>CD28<sup>-</sup>LFA<sup>high</sup> T-cells (modified Wright staining). b) Comparison between CD8<sup>+</sup>CD28<sup>-</sup>LFA<sup>high</sup> and CD8<sup>+</sup>CD28<sup>-</sup>CD57<sup>+</sup> T-cells

## Supplementary Figure 2

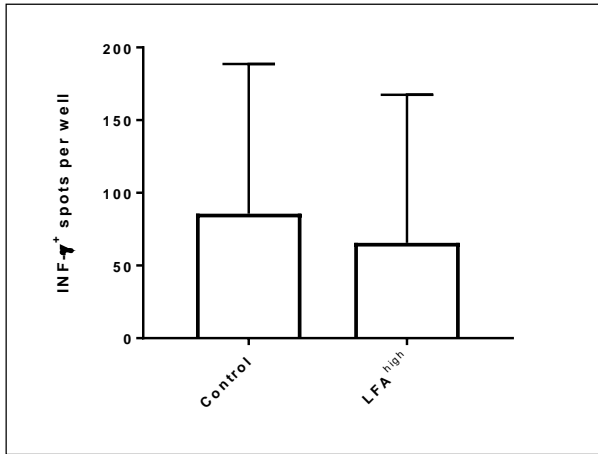

Effect of CD8<sup>+</sup>CD28<sup>-</sup>LFA<sup>high</sup> T-cells from MM patients (n=3) on the expansion of MART-1 specific T-cells with MART-1<sub>aa26-35</sub>\*A27L pulsed DC

### Supplementary Figure 3

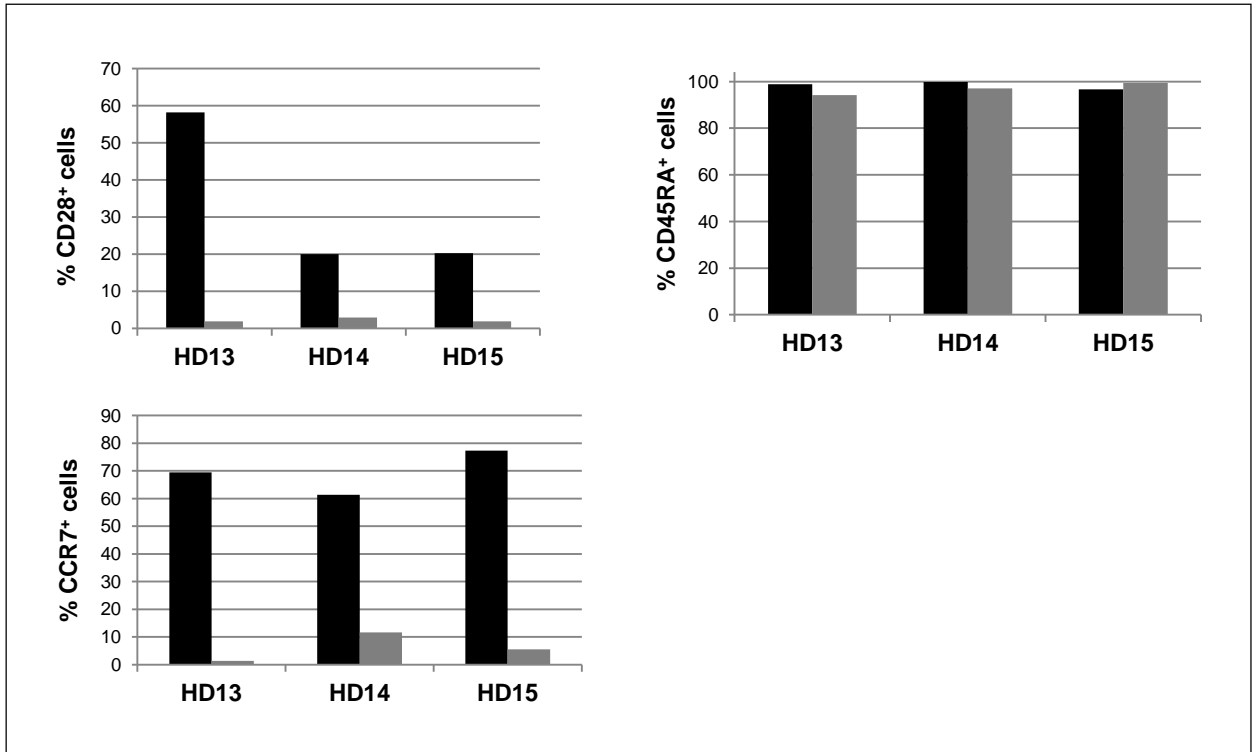

Maturation stage of initially CD8<sup>+</sup>CD28<sup>-</sup>LFA<sup>+</sup> (black) and CD8<sup>+</sup>CD28<sup>-</sup>LFA<sup>high</sup> (grey) T-cells following incubation with autologous PBMCs and DCs for 6 days from 3 donors.
